# Supplementary material for: Amino acid impact factor
Source: PubMed Central journal article supplement (PMC5999116; doi:10.1371/journal.pone.0198645), 2018-06-13
Supplement: pone.0198645.s001.pdf [file pone.0198645.s001.pdf]

# Supplementary Information

## Amino Acid Impact Factor

C. K. Sruthi<sup>1</sup> and Meher Prakash<sup>1\*</sup>

<sup>1</sup> *Theoretical Sciences Unit, Jawaharlal Nehru Centre for Advanced Scientific Research*

*Bangalore-560064, India*

May 27, 2018

| Residue Id | Impact factor             | Impact factor             | Impact factor             |
|------------|---------------------------|---------------------------|---------------------------|
|            | Full data, $\gamma = 0.7$ | Full data, $\gamma = 0.8$ | Half data, $\gamma = 0.8$ |
| 19         | 2                         | -                         | -                         |
| 29         | 1                         | 1                         | 1                         |
| 32         | 1                         | 1                         | 1                         |
| 34         | 2                         | -                         | -                         |
| 40         | 1                         | 1                         | 1                         |
| 42         | 1                         | -                         | -                         |
| 57         | 1                         | 1                         | 1                         |
| 58         | 1                         | 1                         | 1                         |
| 100        | 1                         | -                         | -                         |
| 102        | 2                         | 1                         | 1                         |
| 122        | 1                         | -                         | -                         |
| 136        | 1                         | 1                         | 1                         |
| 140        | 3                         | -                         | -                         |
| 142        | 2                         | -                         | -                         |
| 168        | 1                         | -                         | -                         |
| 182        | 2                         | -                         | 1                         |
| 183        | 2                         | -                         | -                         |
| 184        | 2                         | -                         | -                         |
| 189        | 1                         | 1                         | 1                         |
| 191        | 1                         | -                         | -                         |
| 194        | 3                         | -                         | -                         |
| 196        | 8                         | 1                         | -                         |
| 201        | 1                         | 1                         | 1                         |
| 211        | 1                         | -                         | -                         |
| 216        | 2                         | -                         | -                         |
| 226        | 1                         | 1                         | 1                         |
| 228        | 2                         | -                         | -                         |
| 237        | 1                         | -                         | -                         |

**Table 1.** Table showing the variation of impact factor with different data set sizes and with cut-offs 0.7 and 0.8 in the case of **serine protease**

| Protein                   | No. of residues included in the analysis | Reference sequence id | $\gamma$ | Total no. of connections identified | No. of connections discarded because $p$ -value $>$ 0.01 |
|---------------------------|------------------------------------------|-----------------------|----------|-------------------------------------|----------------------------------------------------------|
| Serine Protease           | 216                                      | TRY2_RAT              | 0.7      | 48                                  | 0                                                        |
| DHFR                      | 158                                      | DYR_ECOLI             | 0.7      | 21                                  | 1                                                        |
| PGK                       | 398                                      | PGK1_HUMAN            | 0.8      | 361                                 | 0                                                        |
| HIV protease              | 99                                       | K03455                | 0.8      | 44                                  | 16                                                       |
| HIV reverse transcriptase | 440                                      | K03455                | 0.8      | 340                                 | 182                                                      |
| GAG-POL polyprotein       | 1503                                     | K03455                | 0.9      | 2486                                | 1319                                                     |

**Table 2.** Table showing the number connections that are identified with a chosen  $\gamma$  as well as the number of connections with  $p$ -value  $>$  0.01 that were discarded from the analysis. The Pfam alignment did not have all the residues in the reference PDB, so the analyses do not include all the sequence positions which are present in the pdb.

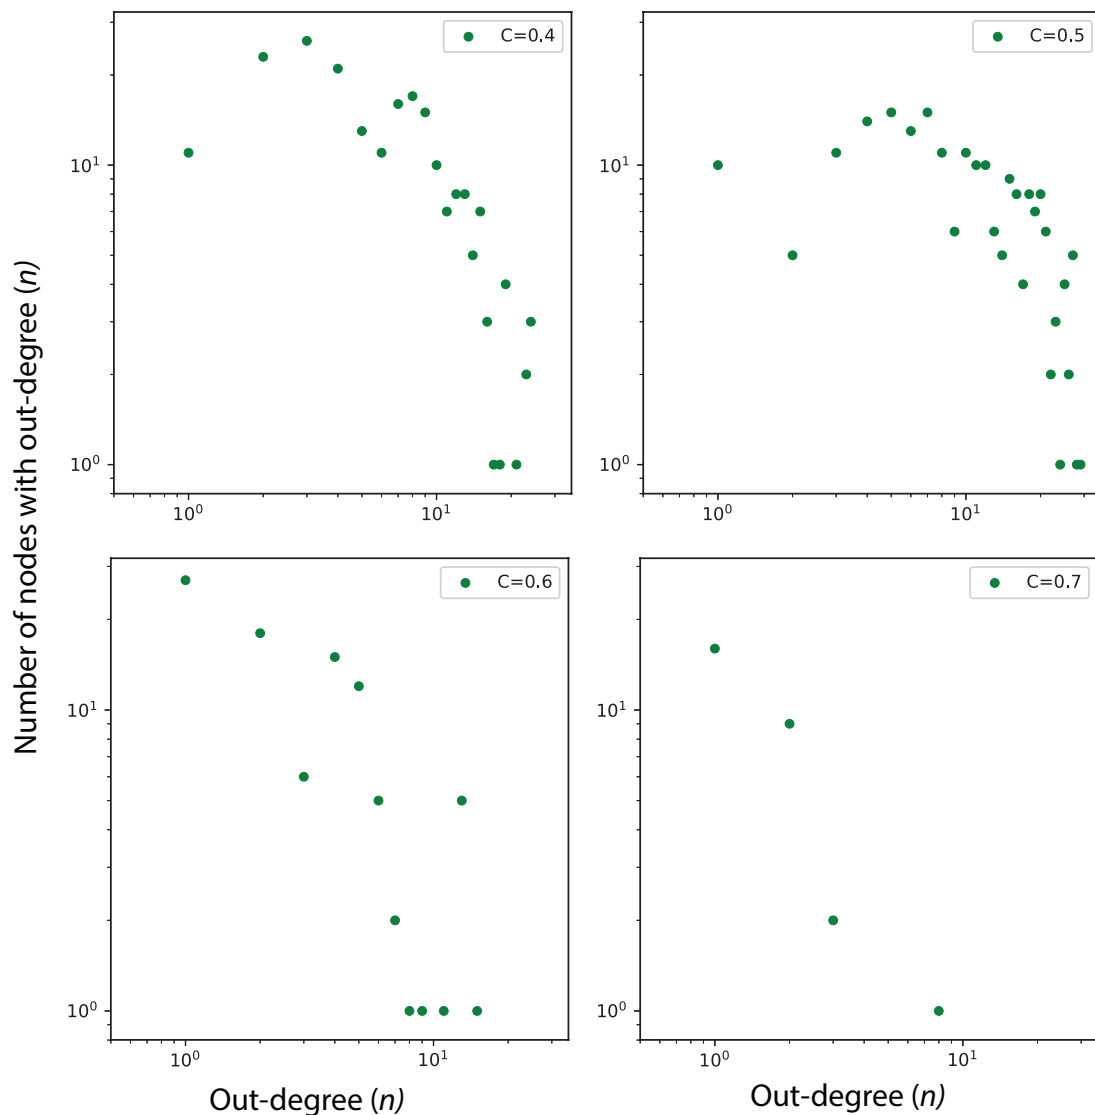

**Fig 1.** The change in node-outdegree distribution for serine protease. The x-axis indicates the number of out-going connections from a node, and the y-axis shows how many such connections are present. The different subplots represent the same analysis performed with different choices of the cut-off. It can be seen that when the cut-off goes below 0.6, the network begins show a transition from an scale-free to random network.

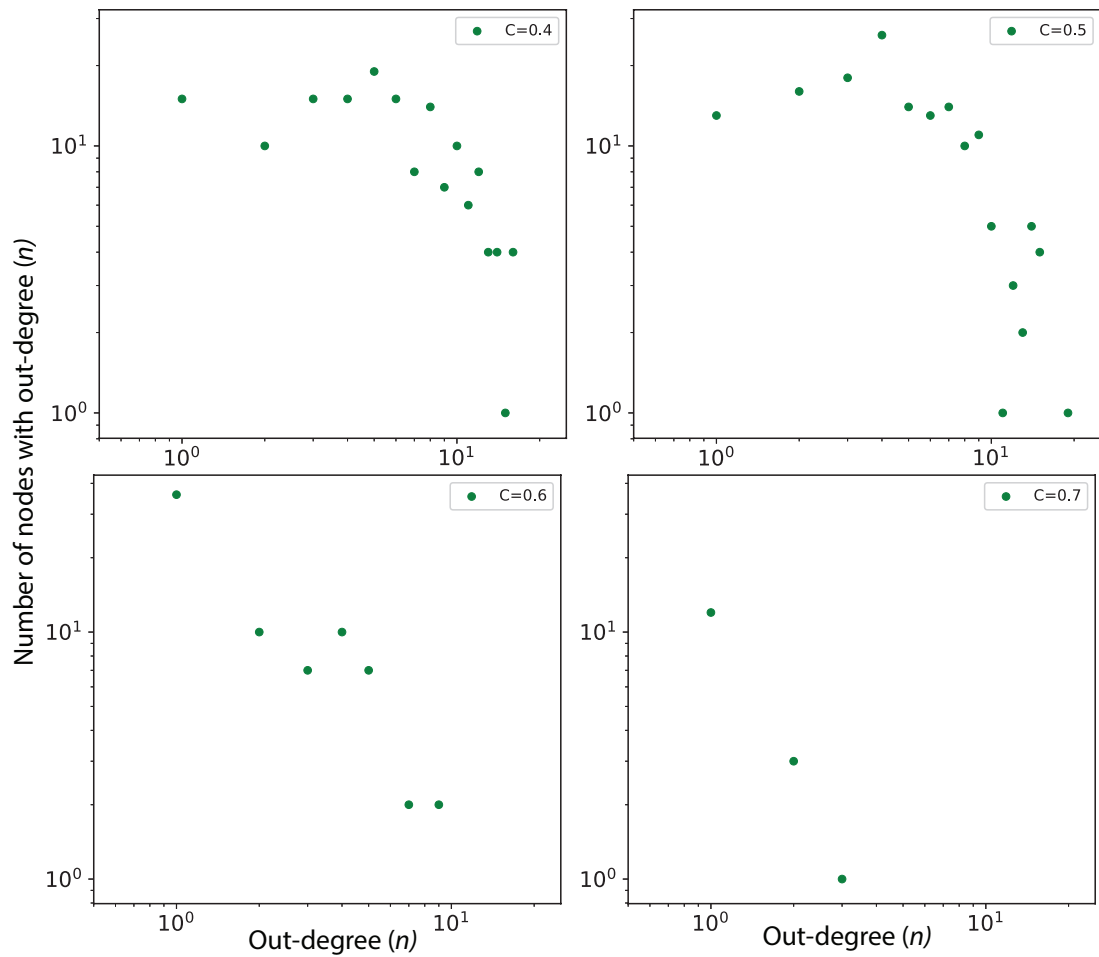

**Fig 2.** The change in node-outdegree distribution for DHFR. The x-axis indicates the number of outgoing connections from a node, and the y-axis shows how many such connections are present. It can be seen that when the cut-off goes below 0.6, the network begins to show a transition from a scale-free to a random network.

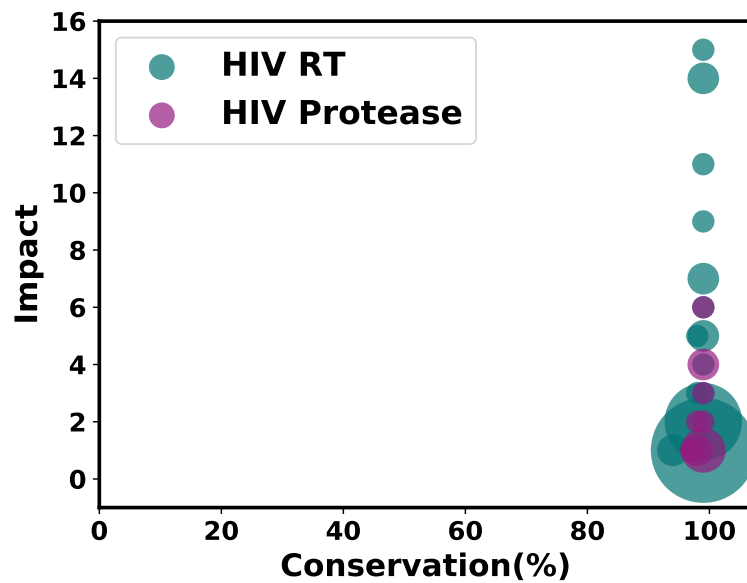

**Fig 3.** Impact-Conservation analysis showing the residues with impact at  $\gamma = 0.8$  on y-axis and conservation on x-axis for HIV-1 protease and reverse transcriptase.
